# Supplementary material for: Jejucarbosides B–E, Chlorinated Cycloaromatized Enediynes, from a Marine Streptomyces sp
Source: MDPI journal article supplement (doi:10.3390/md21070405), 2023-07-18
Supplement: s1 [file s1]

## ***Supporting Information***

# **Jejucarbosides B-E, Chlorinated Cycloaromatized Eneidiynes, from a Marine *Streptomyces* sp.**

Ji Hyeon Im<sup>1</sup>, Yern-Hyerk Shin<sup>1</sup>, Eun Seo Bae<sup>1</sup>, Sang Kook Lee<sup>1</sup>, and Dong-Chan Oh<sup>1,\*</sup>

<sup>1</sup>Natural Products Research Institute, College of Pharmacy, Seoul National University, Seoul 08826, Republic of Korea

Correspondence to:

Prof. Dong-Chan Oh

Natural Products Research Institute,

College of Pharmacy,

Seoul National University, 1 Gwanak-ro, Gwanak-gu,

Seoul 08826, Republic of Korea

TEL: 82-2-880-2491; FAX: 82-2-762-8322; E-mail: dongchanoh@snu.ac.kr

# Table of Contents

|                                                                                                                                                                                          |     |
|------------------------------------------------------------------------------------------------------------------------------------------------------------------------------------------|-----|
| <b>Figure S1.</b> LC/MS profile of the extract of <i>Streptomyces</i> sp. JJC13 showing the characteristic mono-chlorinated pattern ( $[M+H]^+:[M+2+H]^+ = 3:1$ ) of jejucarbosides A-E. | S3  |
| <b>Figure S2.</b> $^1\text{H}$ NMR spectrum of jejucarboside B ( <b>1</b> ) at 850 MHz in $\text{CD}_3\text{CN}$ .                                                                       | S6  |
| <b>Figure S3.</b> $^{13}\text{C}$ NMR spectrum of jejucarboside B ( <b>1</b> ) at 850 MHz in $\text{CD}_3\text{CN}$ .                                                                    | S6  |
| <b>Figure S4.</b> COSY NMR spectrum of jejucarboside B ( <b>1</b> ) at 850 MHz in $\text{CD}_3\text{CN}$ .                                                                               | S7  |
| <b>Figure S5.</b> HSQC NMR spectrum of jejucarboside B ( <b>1</b> ) at 850 MHz in $\text{CD}_3\text{CN}$ .                                                                               | S7  |
| <b>Figure S6.</b> HMBC NMR spectrum of jejucarboside B ( <b>1</b> ) at 850 MHz in $\text{CD}_3\text{CN}$ .                                                                               | S8  |
| <b>Figure S7.</b> ROESY NMR spectrum of jejucarboside B ( <b>1</b> ) at 850 MHz in $\text{CD}_3\text{CN}$ .                                                                              | S8  |
| <b>Figure S8.</b> $^1\text{H}$ NMR spectrum of jejucarboside C ( <b>2</b> ) at 850 MHz in $\text{CD}_3\text{CN}$ .                                                                       | S9  |
| <b>Figure S9.</b> $^{13}\text{C}$ NMR spectrum of jejucarboside C ( <b>2</b> ) at 850 MHz in $\text{CD}_3\text{CN}$ .                                                                    | S9  |
| <b>Figure S10.</b> COSY NMR spectrum of jejucarboside C ( <b>2</b> ) at 850 MHz in $\text{CD}_3\text{CN}$ .                                                                              | S10 |
| <b>Figure S11.</b> HSQC NMR spectrum of jejucarboside C ( <b>2</b> ) at 850 MHz in $\text{CD}_3\text{CN}$ .                                                                              | S10 |
| <b>Figure S12.</b> HMBC NMR spectrum of jejucarboside C ( <b>2</b> ) at 850 MHz in $\text{CD}_3\text{CN}$ .                                                                              | S11 |
| <b>Figure S13.</b> ROESY NMR spectrum of jejucarboside C ( <b>2</b> ) at 850 MHz in $\text{CD}_3\text{CN}$ .                                                                             | S11 |
| <b>Figure S14.</b> $^1\text{H}$ NMR spectrum of jejucarboside D ( <b>3</b> ) at 850 MHz in $\text{CD}_3\text{CN}$ .                                                                      | S12 |
| <b>Figure S15.</b> $^{13}\text{C}$ NMR spectrum of jejucarboside D ( <b>3</b> ) at 850 MHz in $\text{CD}_3\text{CN}$ .                                                                   | S12 |
| <b>Figure S16.</b> COSY NMR spectrum of jejucarboside D ( <b>3</b> ) at 850 MHz in $\text{CD}_3\text{CN}$ .                                                                              | S13 |
| <b>Figure S17.</b> HSQC NMR spectrum of jejucarboside D ( <b>3</b> ) at 850 MHz in $\text{CD}_3\text{CN}$ .                                                                              | S13 |
| <b>Figure S18.</b> HMBC NMR spectrum of jejucarboside D ( <b>3</b> ) at 850 MHz in $\text{CD}_3\text{CN}$ .                                                                              | S14 |
| <b>Figure S19.</b> ROESY NMR spectrum of jejucarboside D ( <b>3</b> ) at 850 MHz in $\text{CD}_3\text{CN}$ .                                                                             | S14 |
| <b>Figure S20.</b> $^1\text{H}$ NMR spectrum of jejucarboside E ( <b>4</b> ) at 850 MHz in $\text{CD}_3\text{CN}$ .                                                                      | S15 |
| <b>Figure S21.</b> $^{13}\text{C}$ NMR spectrum of jejucarboside E ( <b>4</b> ) at 850 MHz in $\text{CD}_3\text{CN}$ .                                                                   | S15 |
| <b>Figure S22.</b> COSY NMR spectrum of jejucarboside E ( <b>4</b> ) at 850 MHz in $\text{CD}_3\text{CN}$ .                                                                              | S16 |
| <b>Figure S23.</b> HSQC NMR spectrum of jejucarboside E ( <b>4</b> ) at 850 MHz in $\text{CD}_3\text{CN}$ .                                                                              | S16 |
| <b>Figure S24.</b> HMBC NMR spectrum of jejucarboside E ( <b>4</b> ) at 850 MHz in $\text{CD}_3\text{CN}$ .                                                                              | S17 |
| <b>Figure S25.</b> ROESY NMR spectrum of jejucarboside E ( <b>4</b> ) at 850 MHz in $\text{CD}_3\text{CN}$ .                                                                             | S17 |
| <b>Table S1.</b> NMR spectroscopic data of jejucarboside A (800 MHz, $\text{CD}_3\text{CN}$ ) and jejucarbosides B-E ( <b>1-4</b> ) (850 MHz, $\text{CD}_3\text{CN}$ ).                  | S18 |
| <b>Table S2.</b> Composition of media used for culture optimization.                                                                                                                     | S19 |
| Phylogenetic analysis of Enediyne Core Gene Amplicons                                                                                                                                    | S20 |
| <b>Figure S26.</b> Phylogenetic tree of the amplicons.                                                                                                                                   | S20 |
| References                                                                                                                                                                               | S21 |

**Figure S1.** LC/MS profile of the extract of *Streptomyces* sp. JJC13 showing the characteristic mono-chlorinated pattern ( $[M+H]^+:[M+2+H]^+ = 3:1$ ) of jejucarbosides A-E.

a. Jejucarboside A

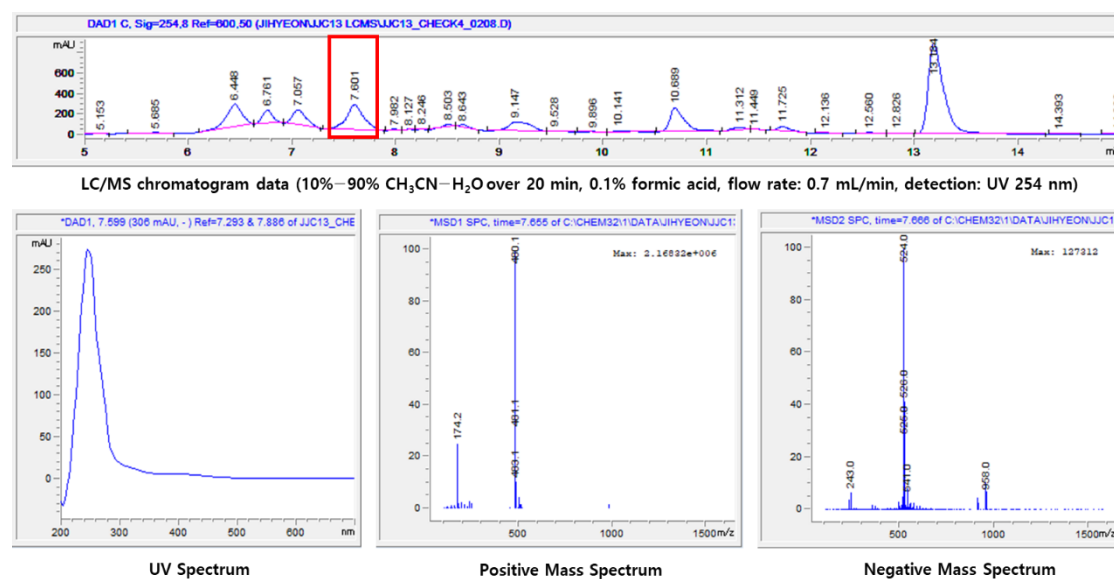

b. Jejucarboside B (1)

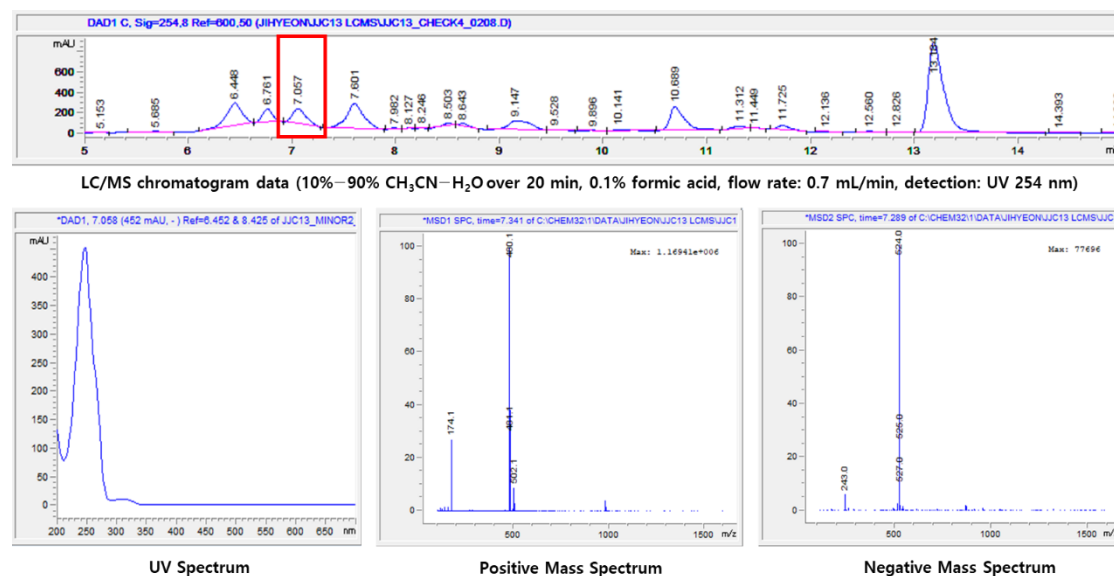

### c. Jejucarboside C (2)

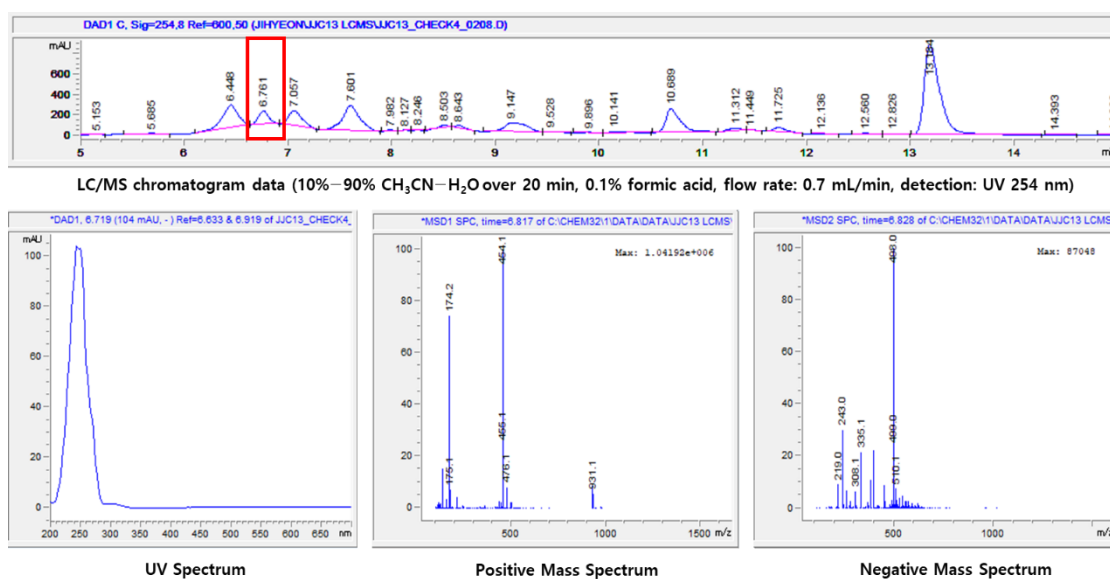

### d. Jejucarboside D (3)

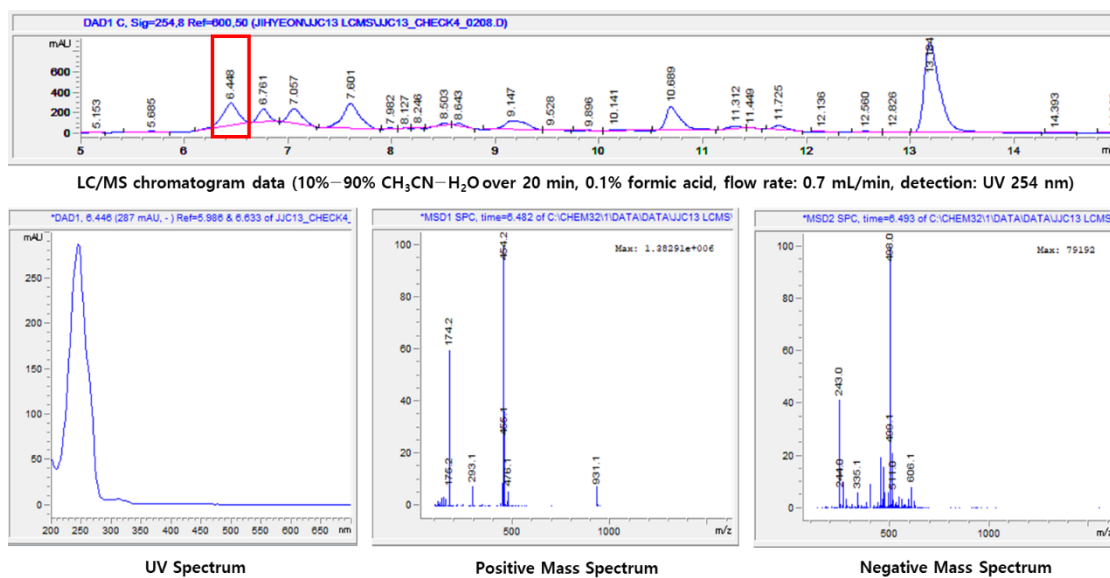

e. Jejucarboside E (4)

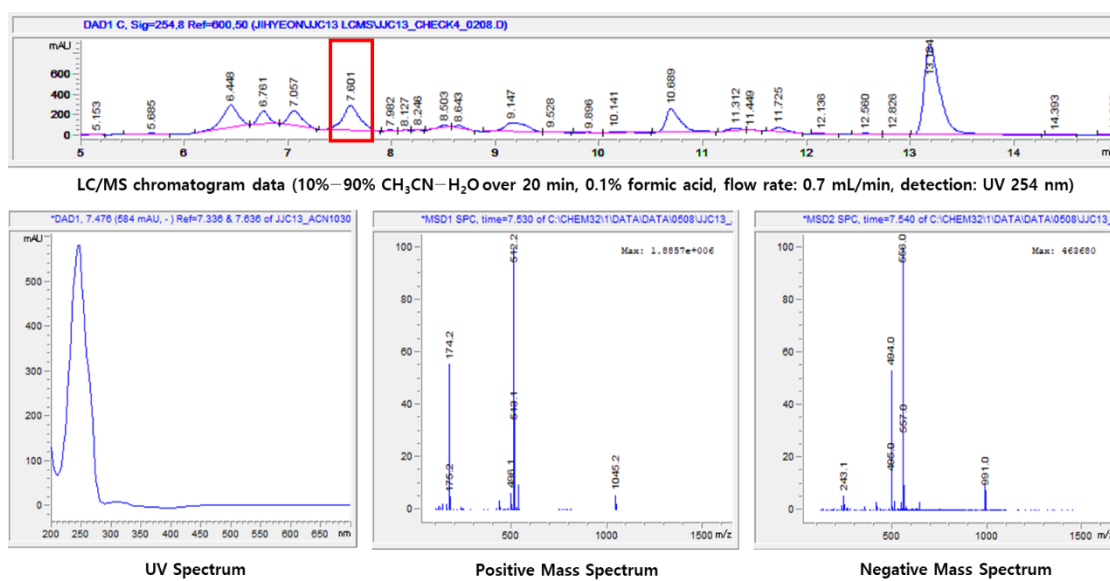

**Figure S2.**  $^1\text{H}$  NMR spectrum of jejucarboside B (**1**) at 850 MHz in  $\text{CD}_3\text{CN}$ .

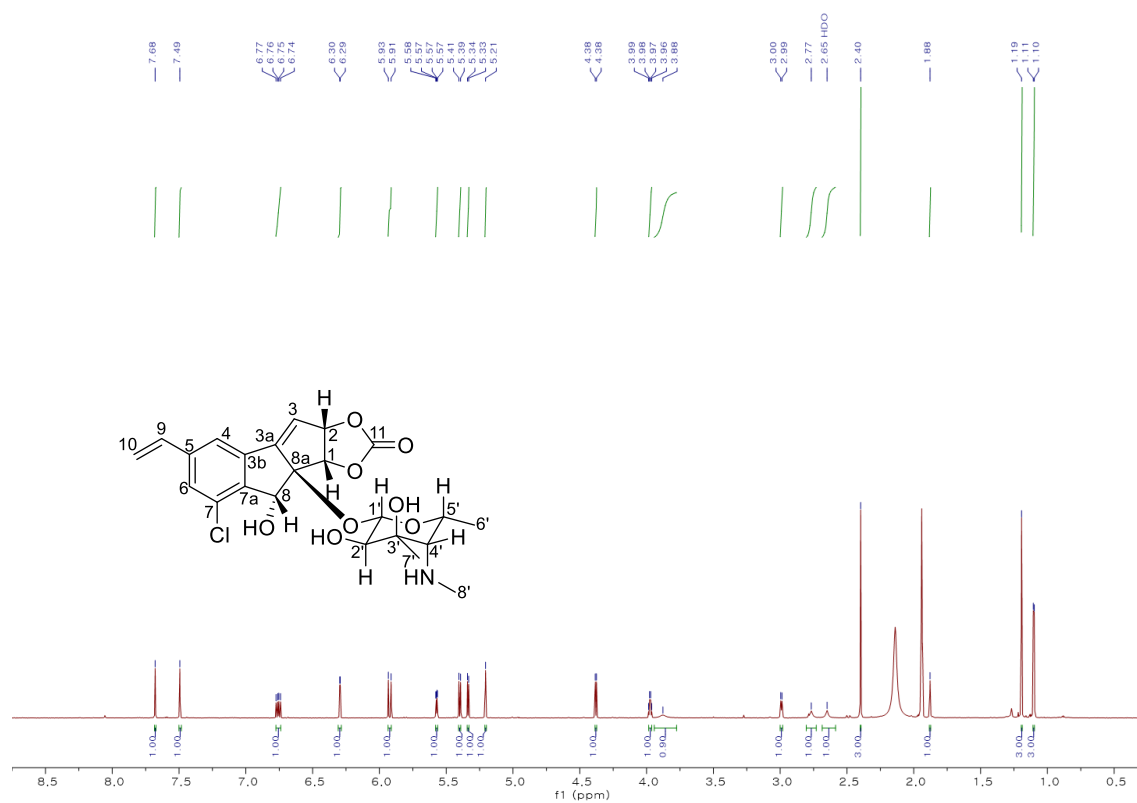

**Figure S3.**  $^{13}\text{C}$  NMR spectrum of jejucarboside B (**1**) at 850 MHz in  $\text{CD}_3\text{CN}$ .

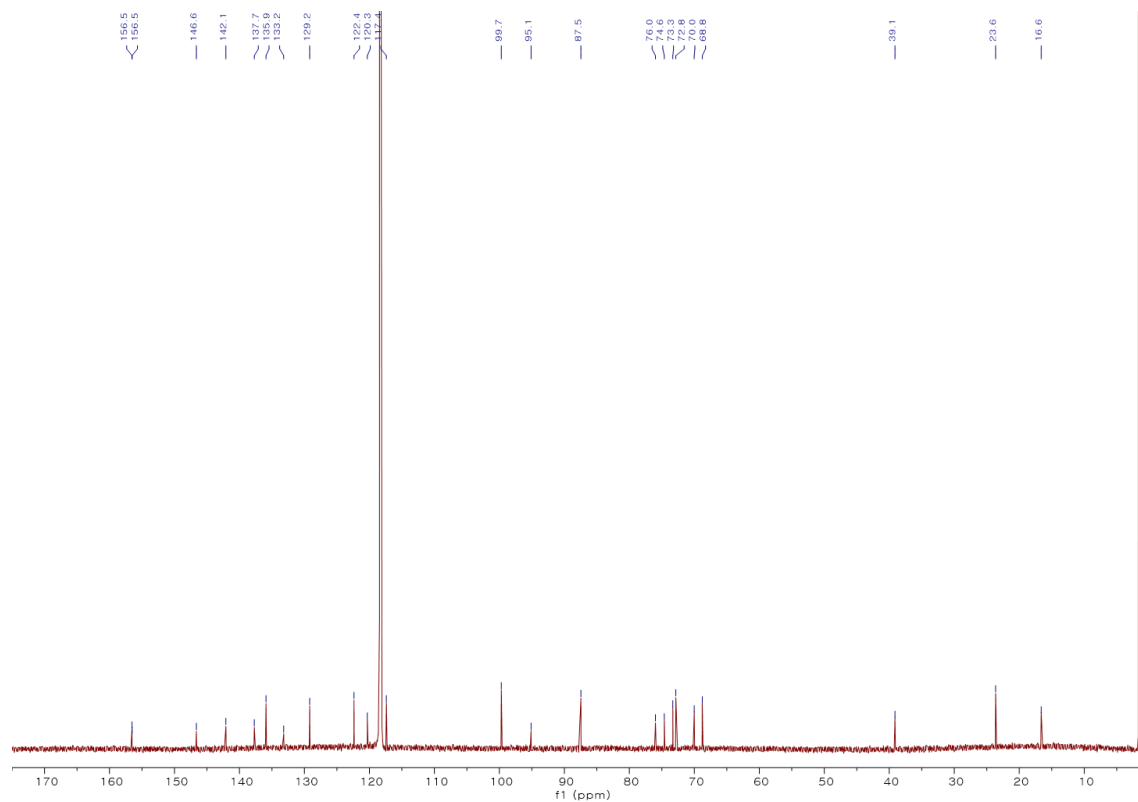

**Figure S4.** COSY NMR spectrum of jejucarboside B (**1**) at 850 MHz in CD<sub>3</sub>CN.

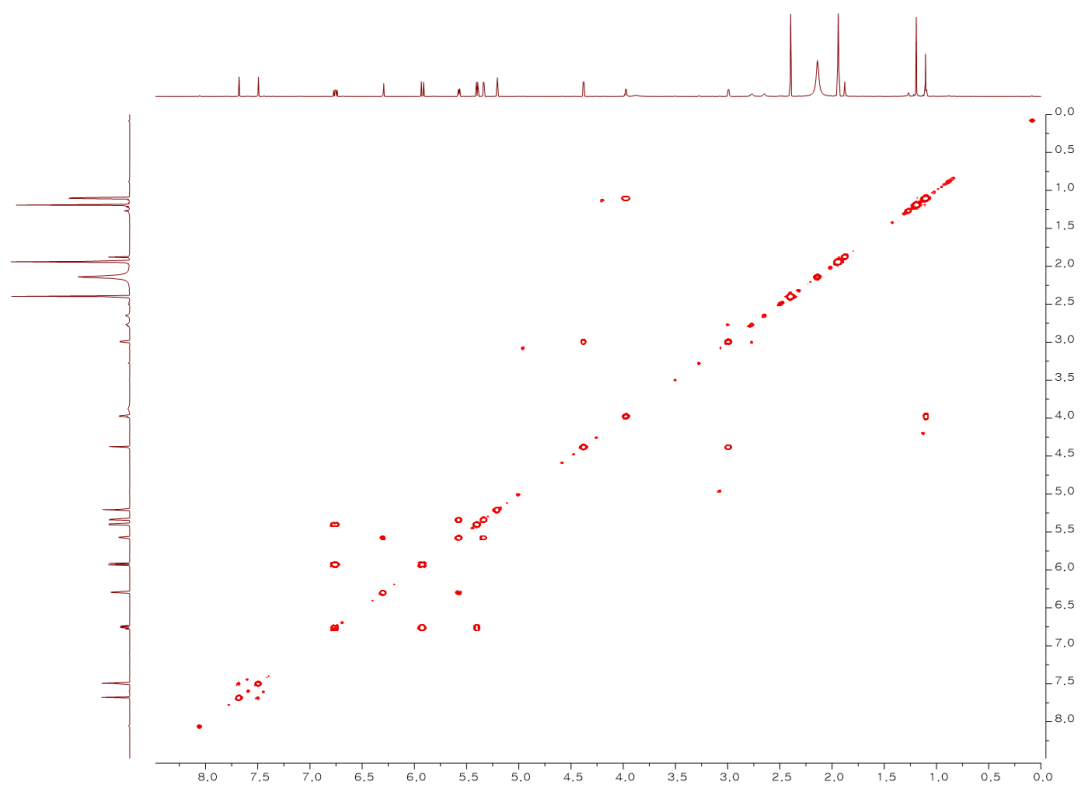

**Figure S5.** HSQC NMR spectrum of jejucarboside B (**1**) at 850 MHz in CD<sub>3</sub>CN.

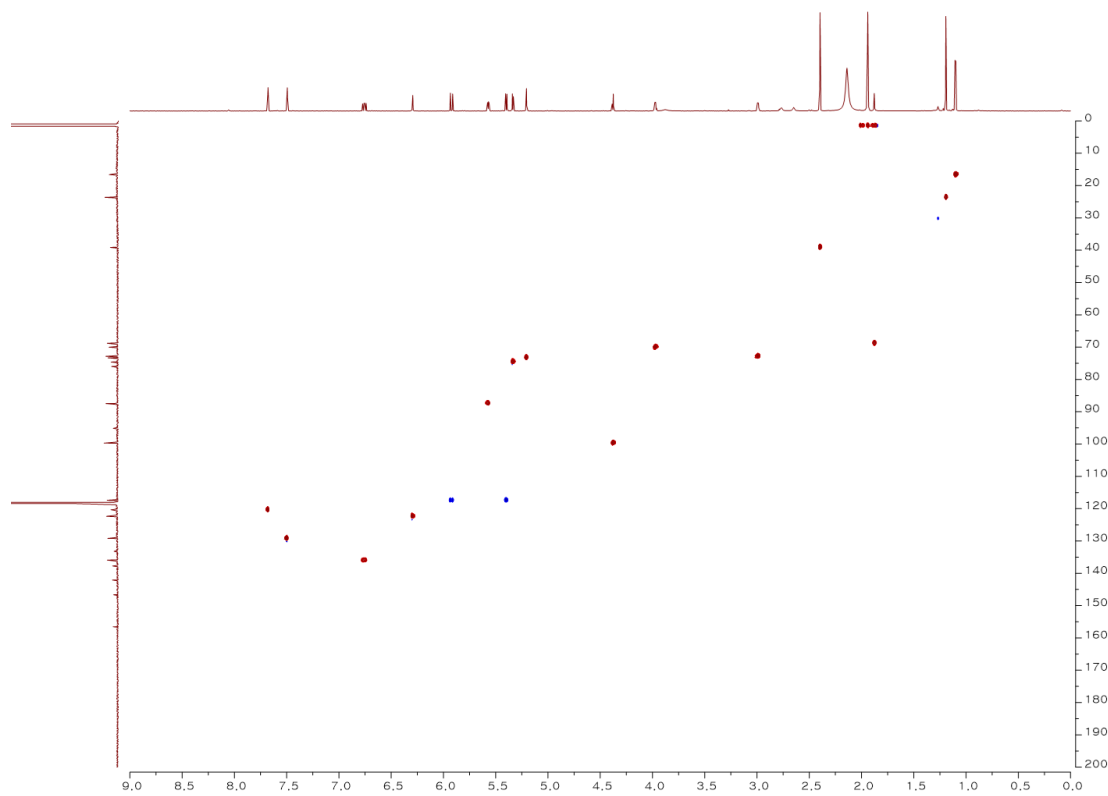

**Figure S6.** HMBC NMR spectrum of jejucarboside B (**1**) at 850 MHz in CD<sub>3</sub>CN.

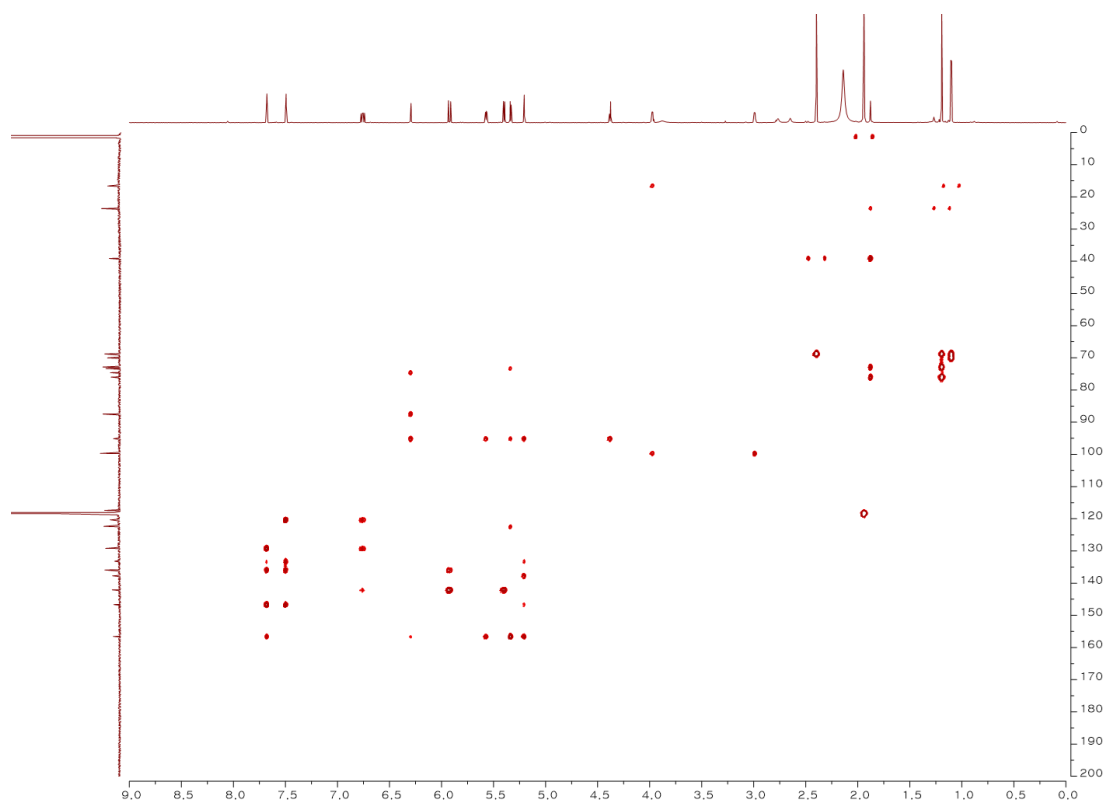

**Figure S7.** ROESY NMR spectrum of jejucarboside B (**1**) at 850 MHz in CD<sub>3</sub>CN.

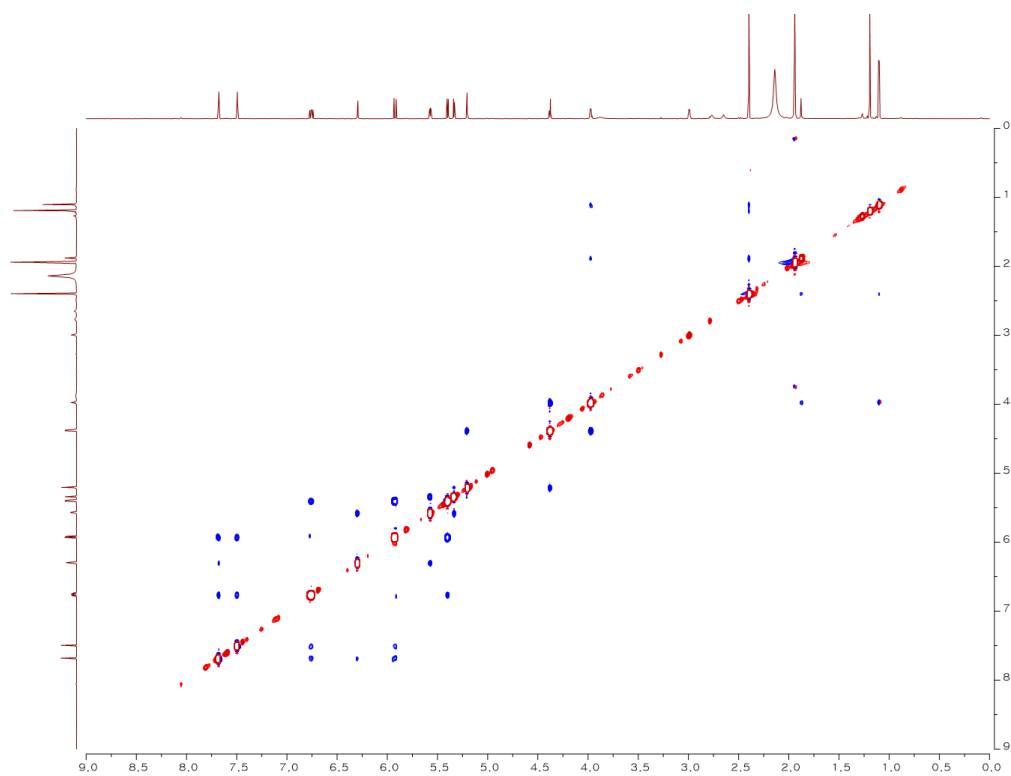



Chemical structure of compound 10 is shown above the spectrum. The structure is a complex molecule featuring a substituted benzene ring (with a chlorine atom at position 4) and a fused sugar-like ring system. Protons are labeled with numbers 1 through 10, and their corresponding NMR signals are indicated by arrows pointing to the peaks in the spectrum.

The  $^1\text{H}$  NMR spectrum (ppm) shows the following peaks and integration values:

- 7.64 (1.00), 7.63 (1.00), 7.40 (1.00), 7.15 (1.00), 7.14 (1.00), 7.13 (1.00), 6.57 (1.00), 5.86 (1.00), 5.85 (1.00), 5.47 (1.00), 5.46 (1.00), 5.01 (1.00), 4.95 (1.00), 4.94 (1.00), 4.59 (1.00), 4.58 (1.00), 4.57 (1.00), 4.25 (1.00), 4.21 (1.00), 4.21 (1.00), 4.20 (1.00), 4.19 (1.00), 4.19 (1.00), 4.19 (1.00), 3.08 (1.00), 3.06 (1.00), 2.41 (3.00), 1.96 (1.00), 1.96 (1.00), 1.22 (3.04), 1.13 (3.03), 1.13 (3.03).

152.6  
150.3  
137.5  
134.7  
133.2  
129.2  
128.6  
128.5  
118.2  
98.6  
96.6  
79.8  
76.1  
73.8  
73.5  
72.3  
70.3  
68.8  
39.1  
23.6  
17.0

f1 (ppm)

**Figure S10.** COSY NMR spectrum of jejucarboside C (**2**) at 850 MHz in CD<sub>3</sub>CN.

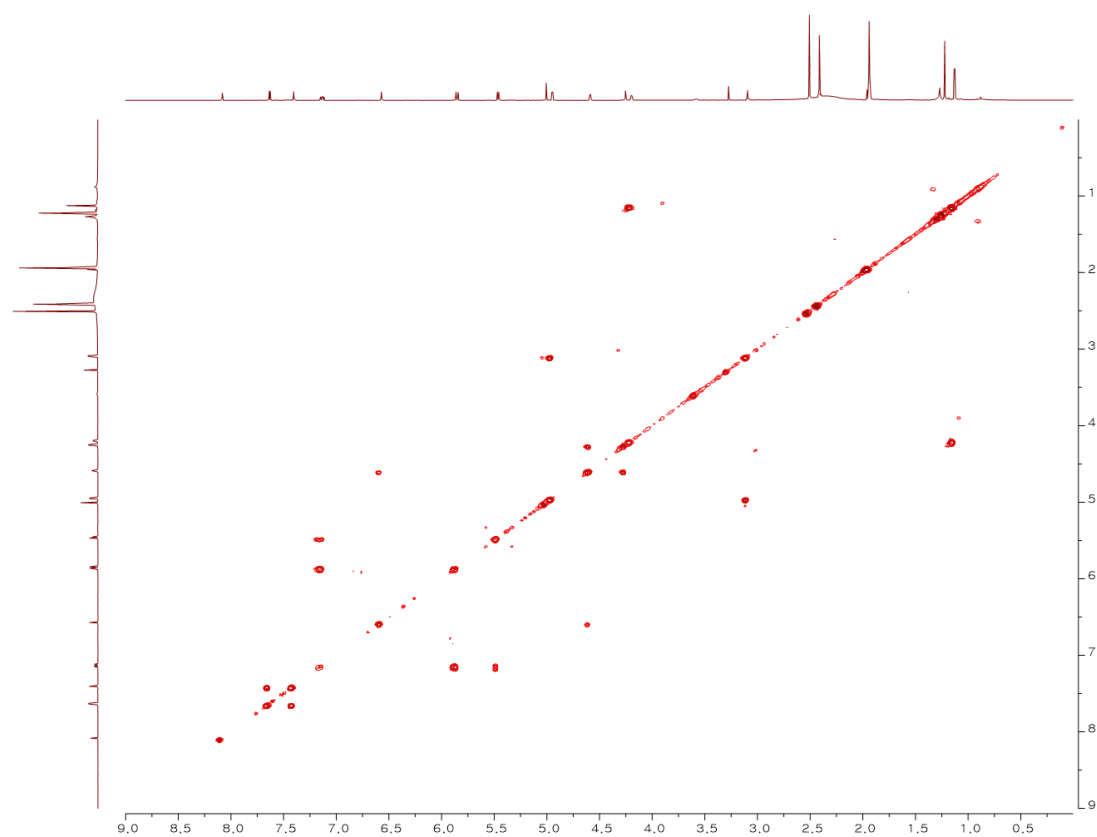

**Figure S11.** HSQC NMR spectrum of jejucarboside C (**2**) at 850 MHz in CD<sub>3</sub>CN.

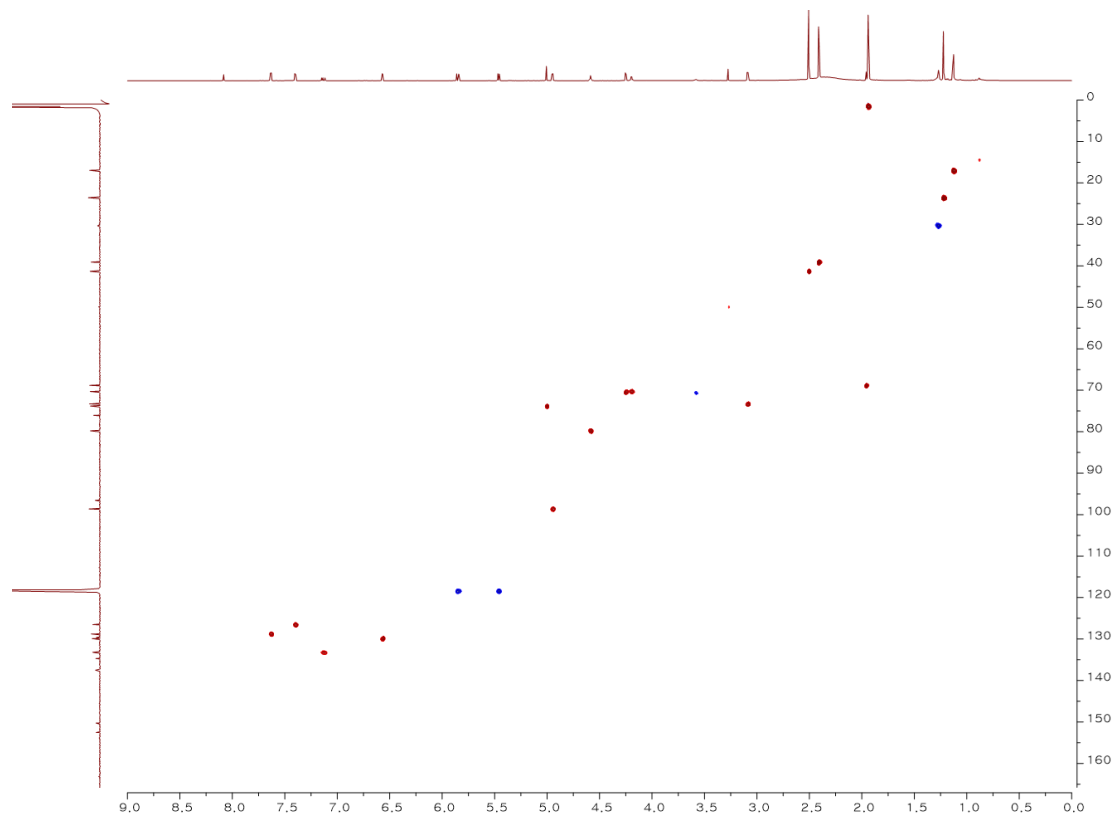

**Figure S12.** HMBC NMR spectrum of jejucarboside C (**2**) at 850 MHz in CD<sub>3</sub>CN.

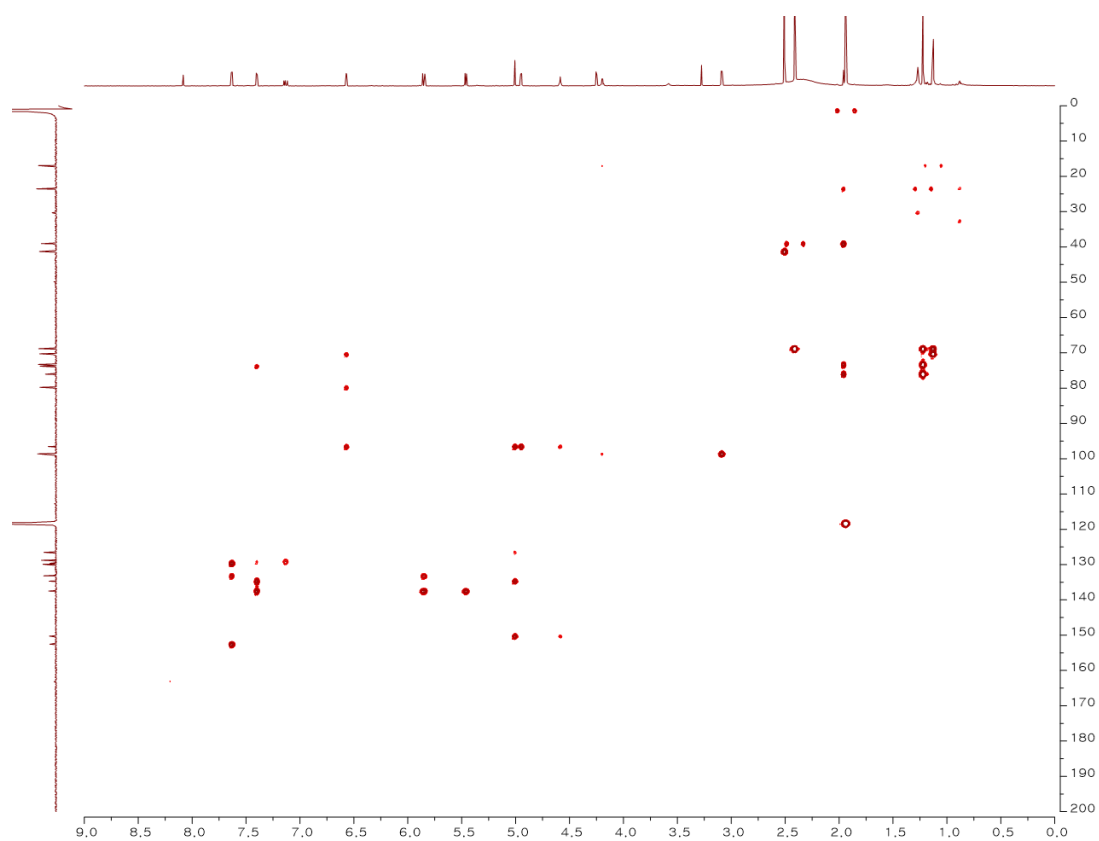

**Figure S13.** ROESY NMR spectrum of jejucarboside C (**2**) at 850 MHz in CD<sub>3</sub>CN.

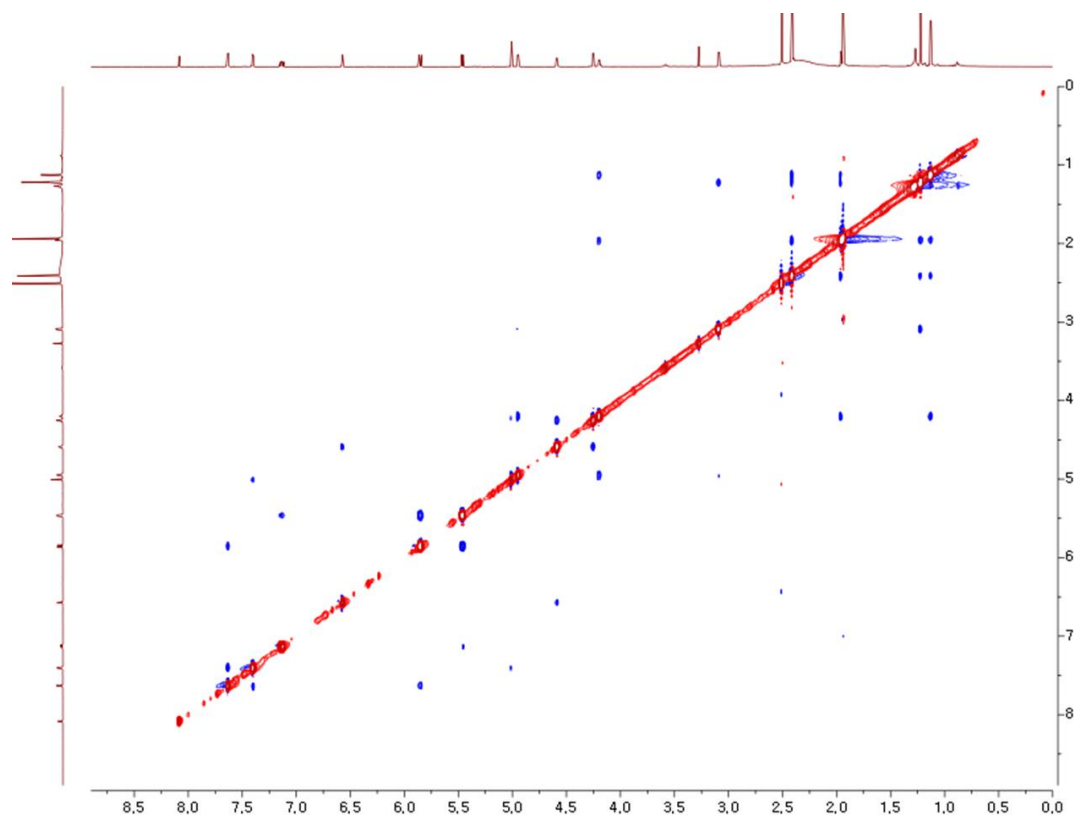

**Figure S14.**  $^1\text{H}$  NMR spectrum of jejucarboside D (**3**) at 850 MHz in  $\text{CD}_3\text{CN}$ .

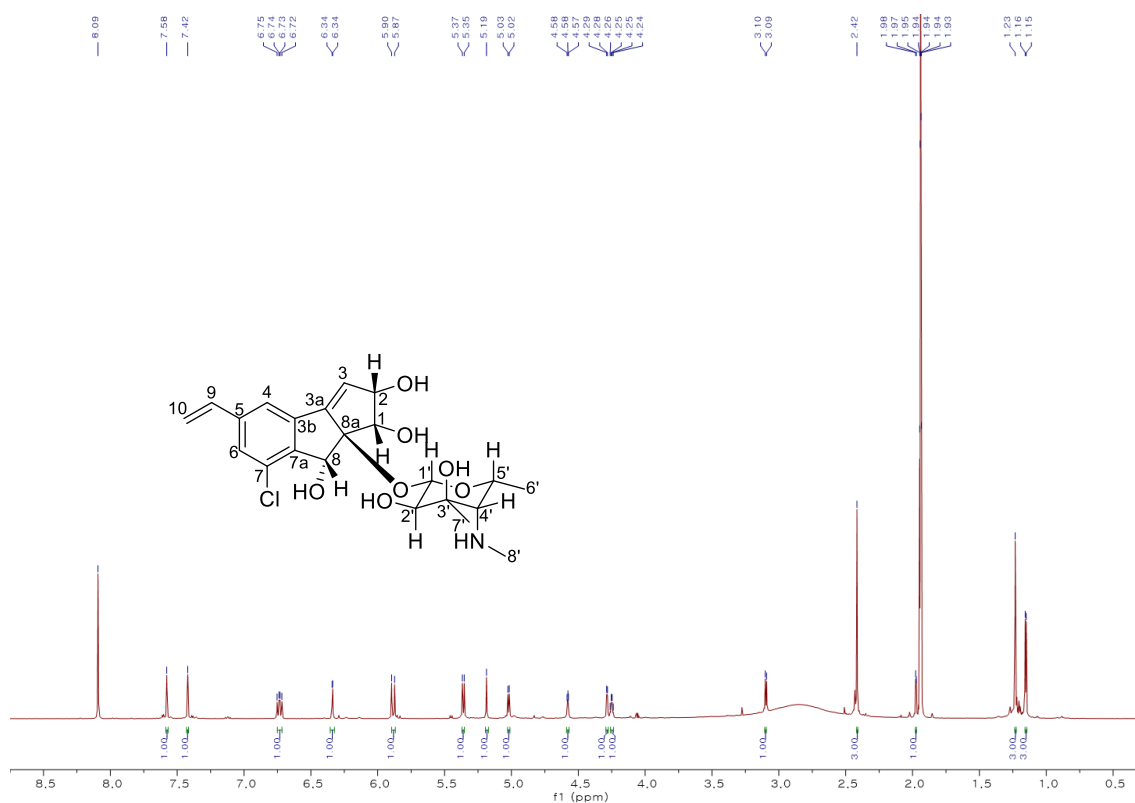

**Figure S15.**  $^{13}\text{C}$  NMR spectrum of jejucarboside D (**3**) at 850 MHz in  $\text{CD}_3\text{CN}$ .

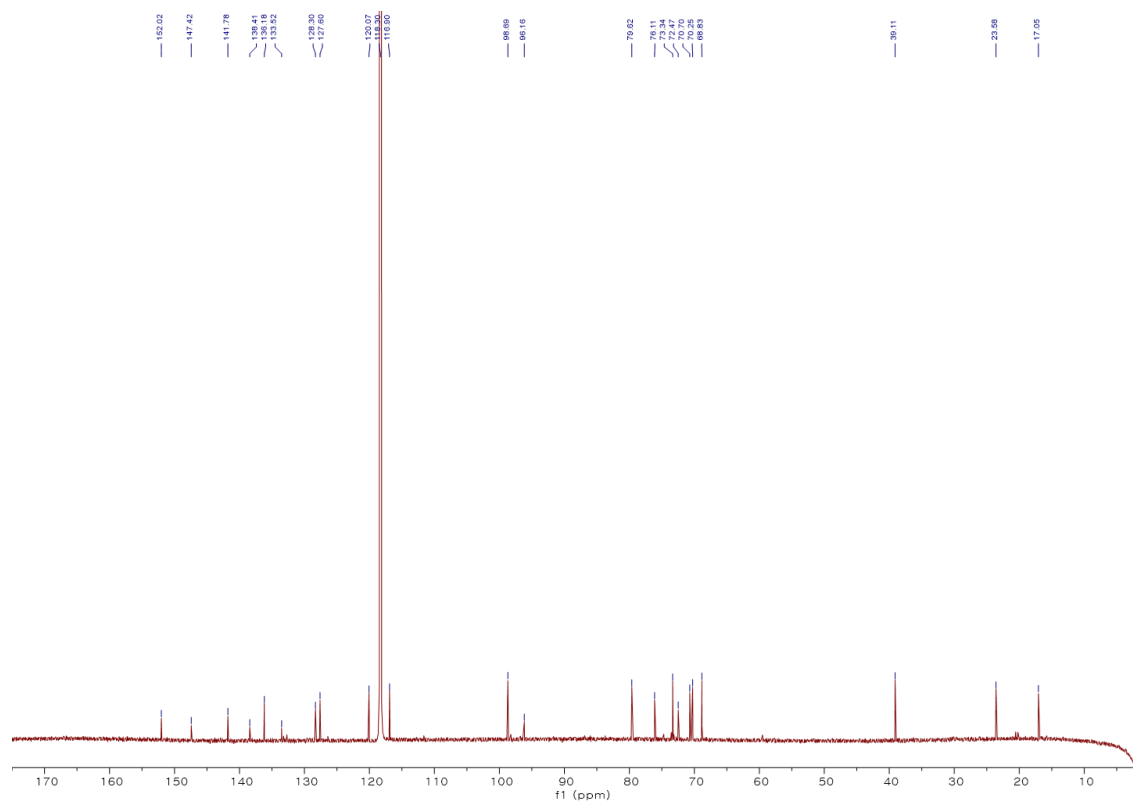

**Figure S16.** COSY NMR spectrum of jejucarboside D (**3**) at 850 MHz in CD<sub>3</sub>CN.

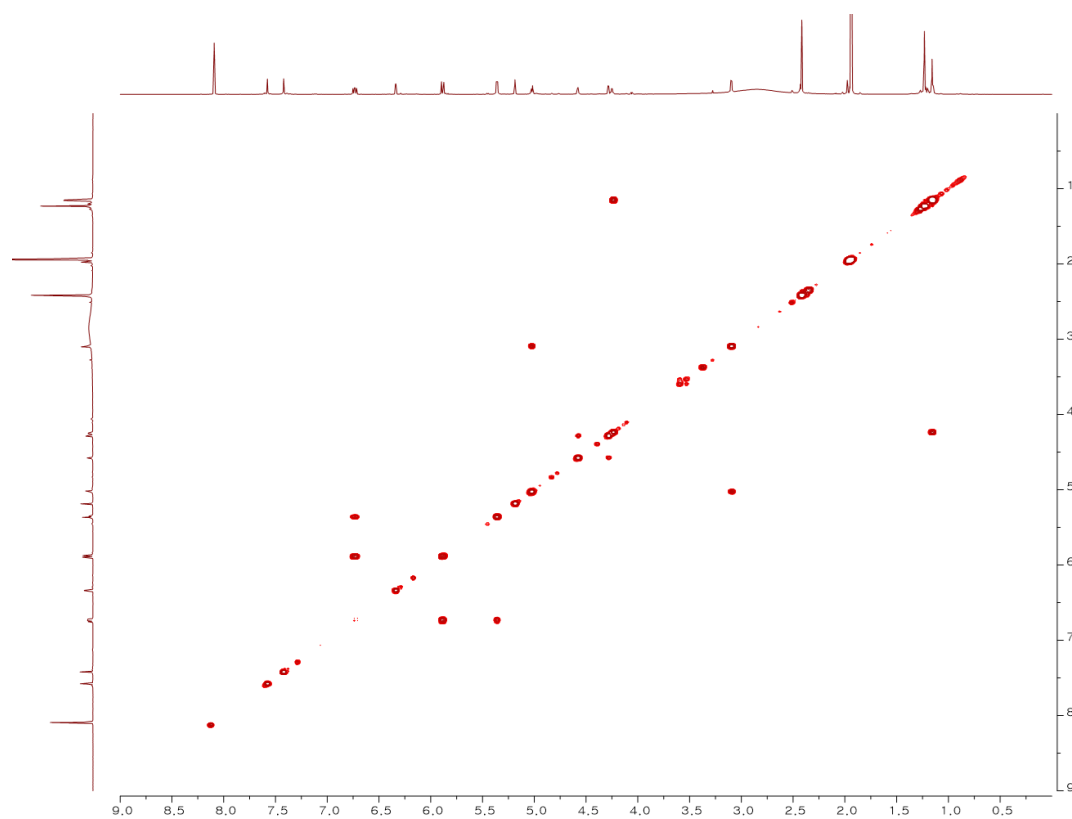

**Figure S17.** HSQC NMR spectrum of jejucarboside D (**3**) at 850 MHz in CD<sub>3</sub>CN.

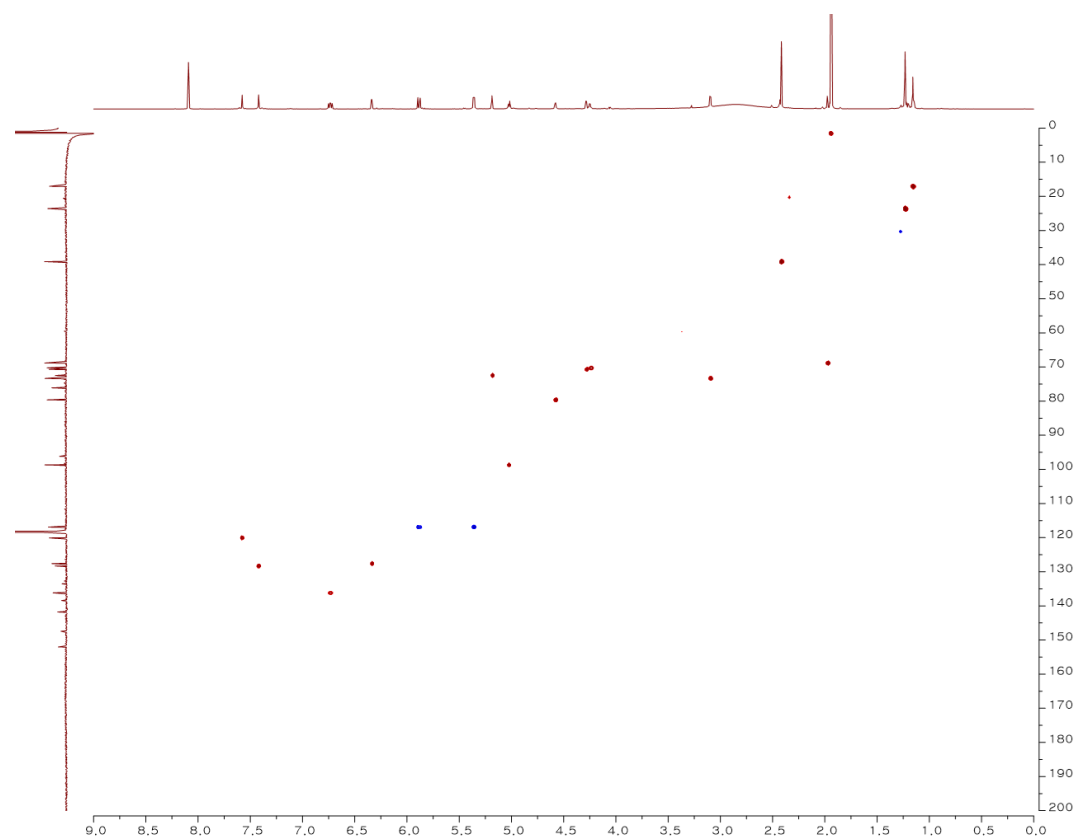

**Figure S18.** HMBC NMR spectrum of jejucarboside D (**3**) at 850 MHz in CD<sub>3</sub>CN.

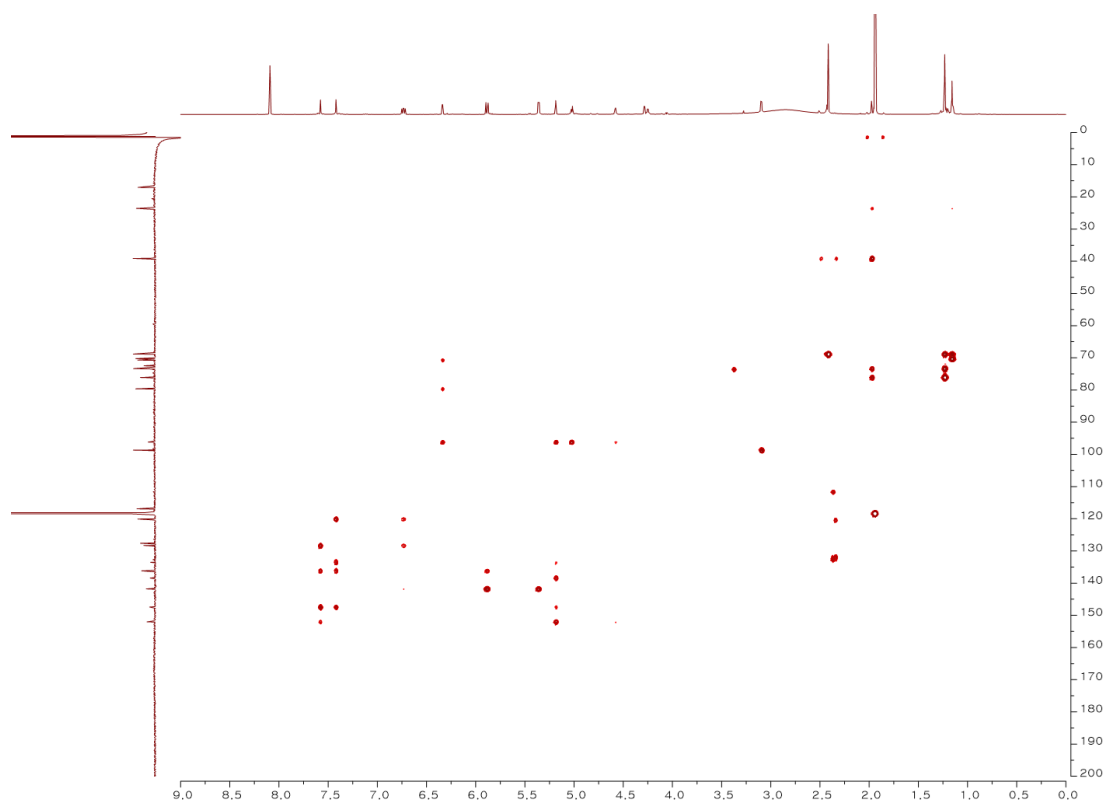

**Figure S19.** ROESY NMR spectrum of jejucarboside D (**3**) at 850 MHz in CD<sub>3</sub>CN.

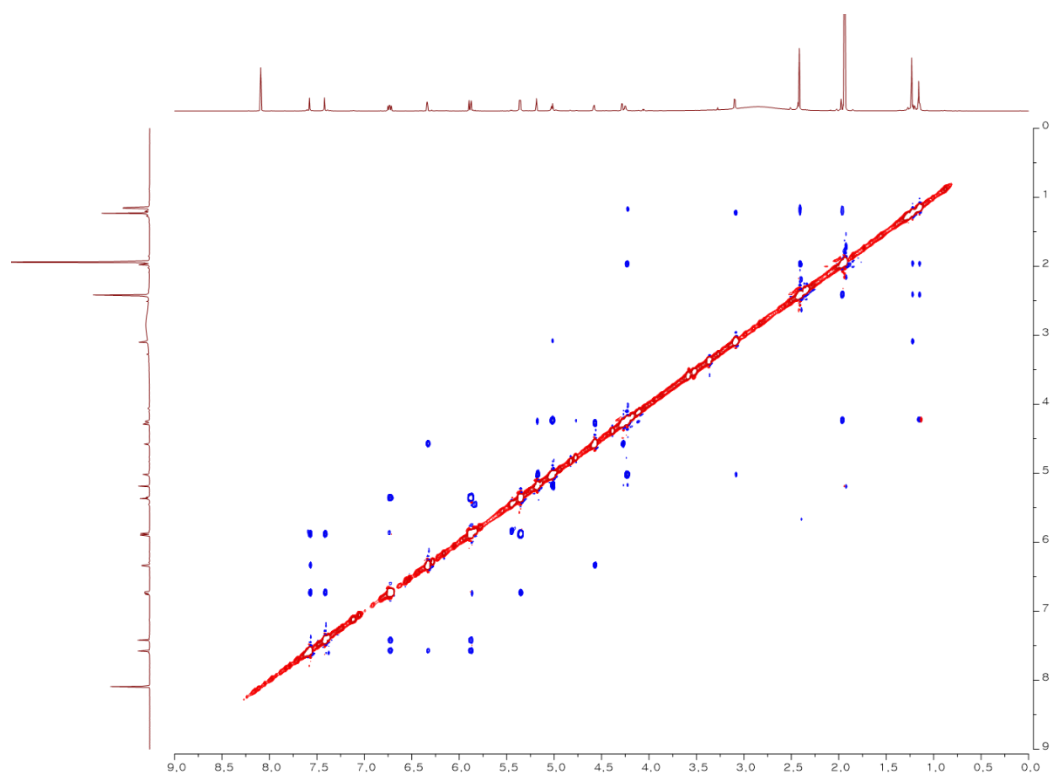

**Figure S20.**  $^1\text{H}$  NMR spectrum of jejucarboside E (**4**) at 850 MHz in  $\text{CD}_3\text{CN}$ .

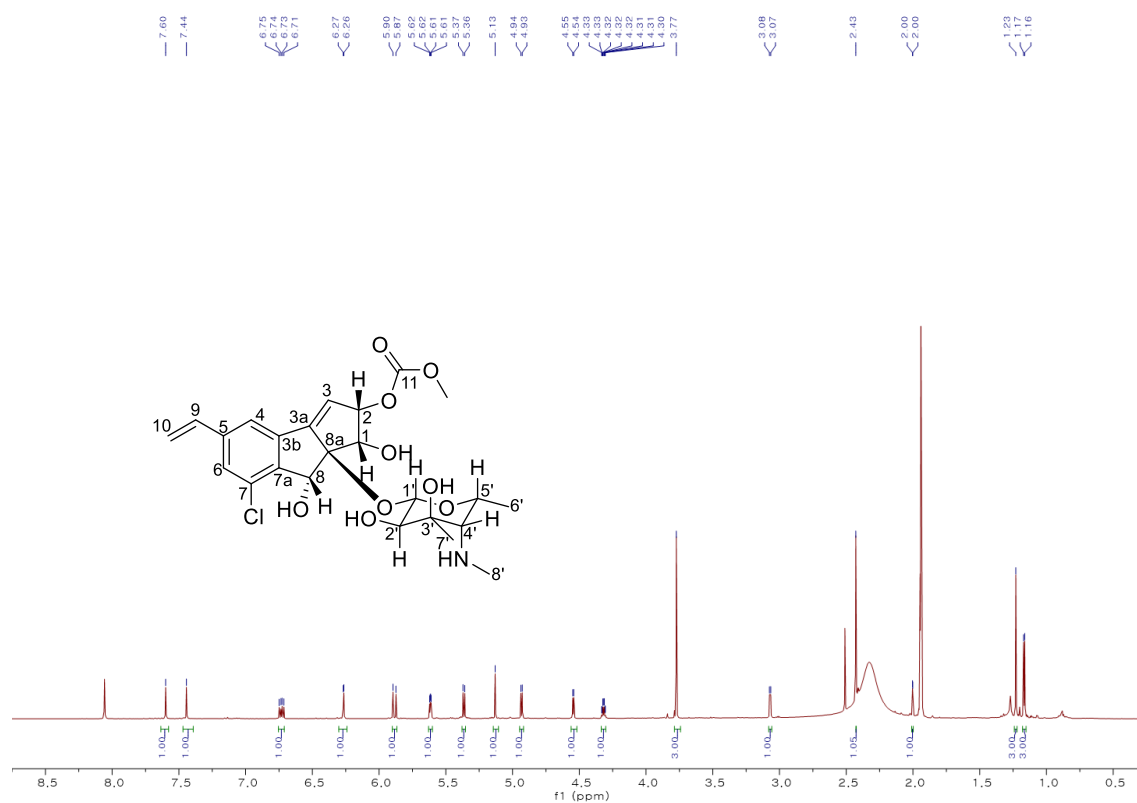

**Figure S21.**  $^{13}\text{C}$  NMR spectrum of jejucarboside E (**4**) at 850 MHz in  $\text{CD}_3\text{CN}$ .

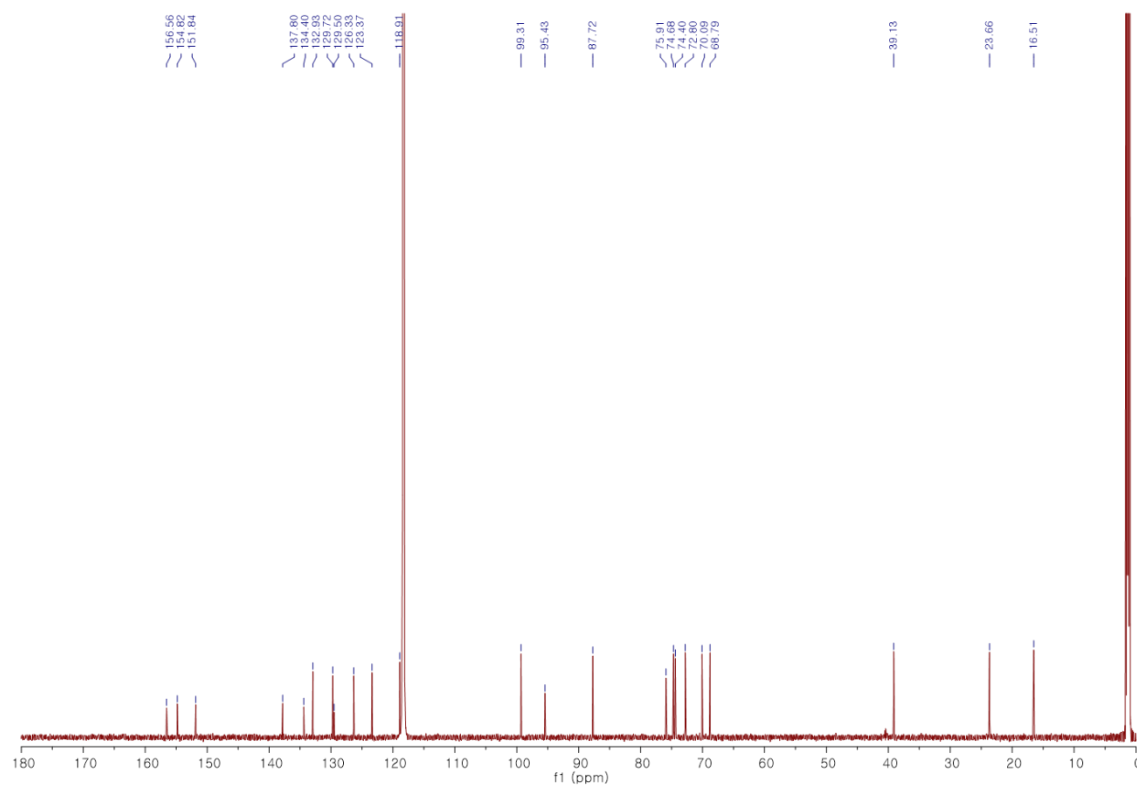

**Figure S22.** COSY NMR spectrum of jejucarboside E (**4**) at 850 MHz in CD<sub>3</sub>CN.

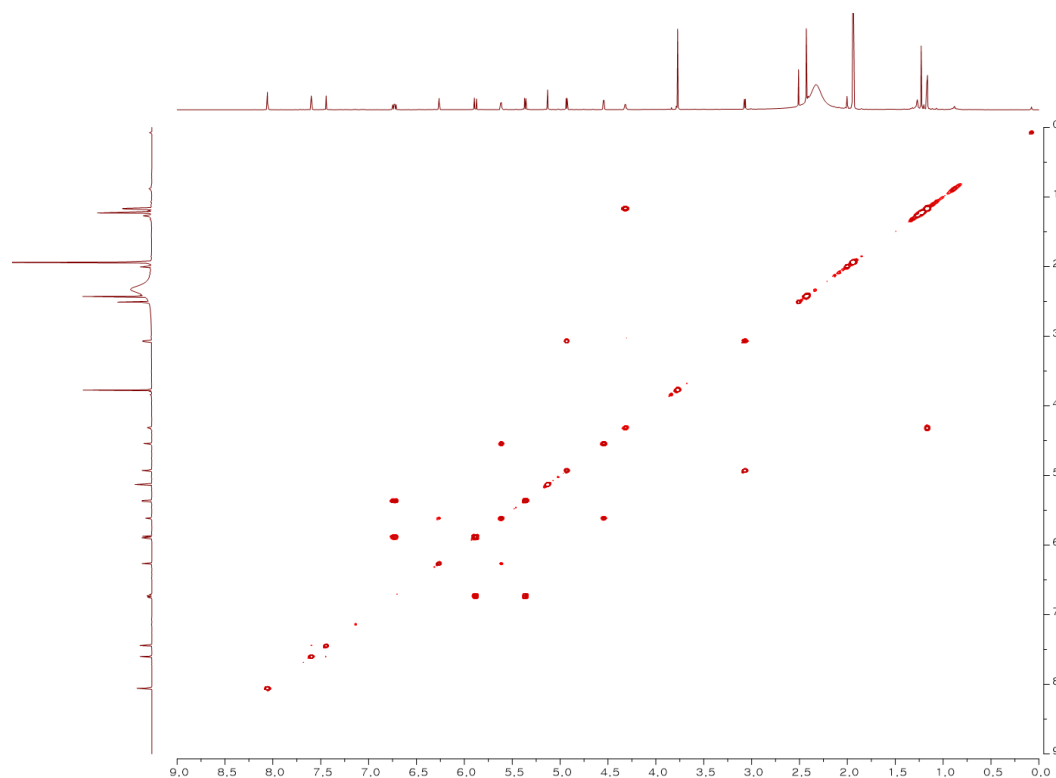

**Figure S23.** HSQC NMR spectrum of jejucarboside E (**4**) at 850 MHz in CD<sub>3</sub>CN.

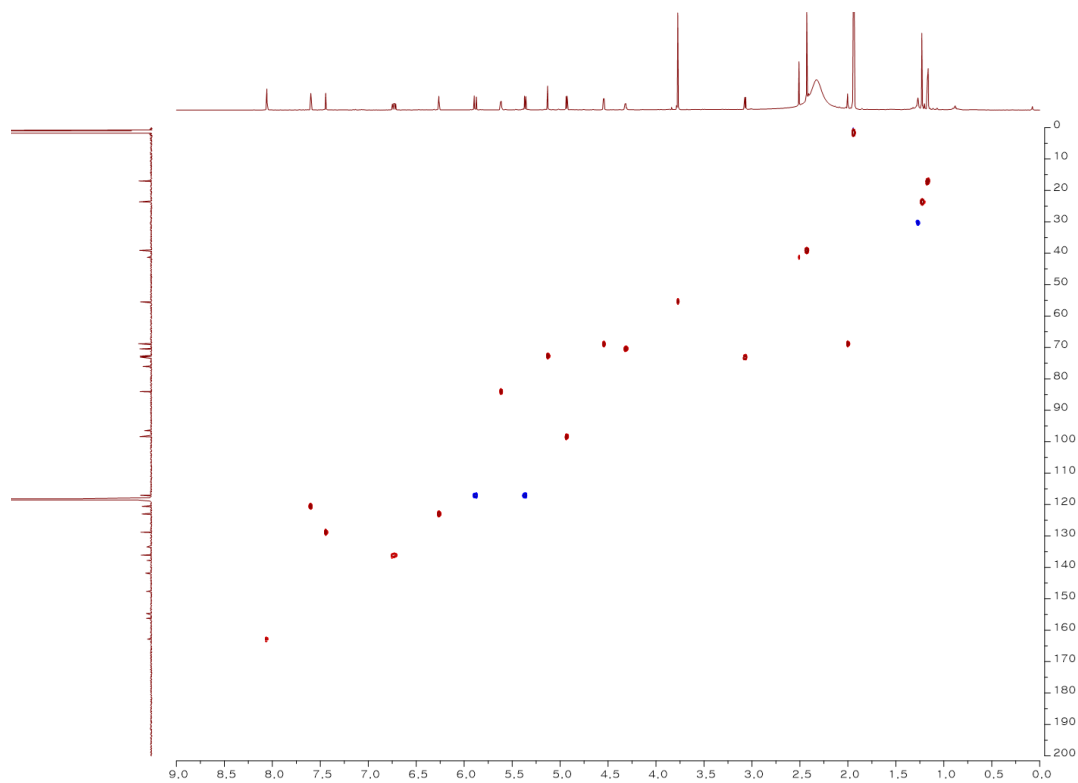



**Figure S24.** HMBC NMR spectrum of jejucarboside E (**4**) at 850 MHz in CD<sub>3</sub>CN.

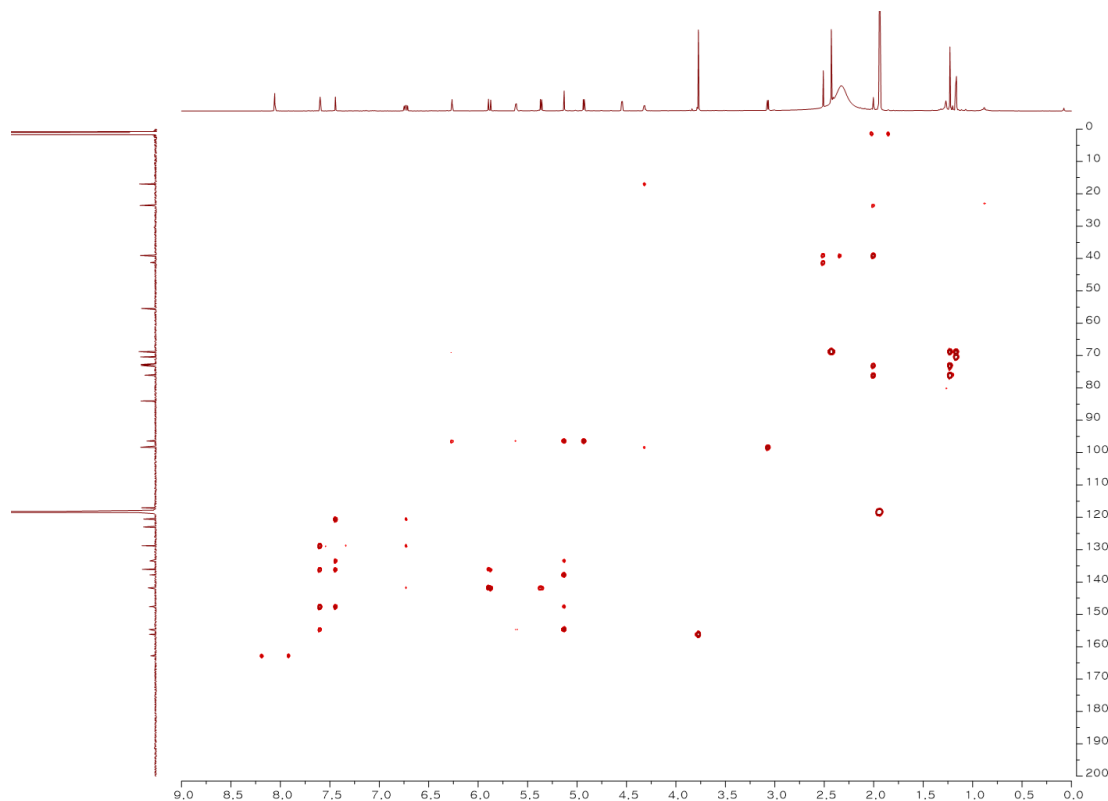

**Figure S25.** ROESY NMR spectrum of jejucarboside E (**4**) at 850 MHz in CD<sub>3</sub>CN.

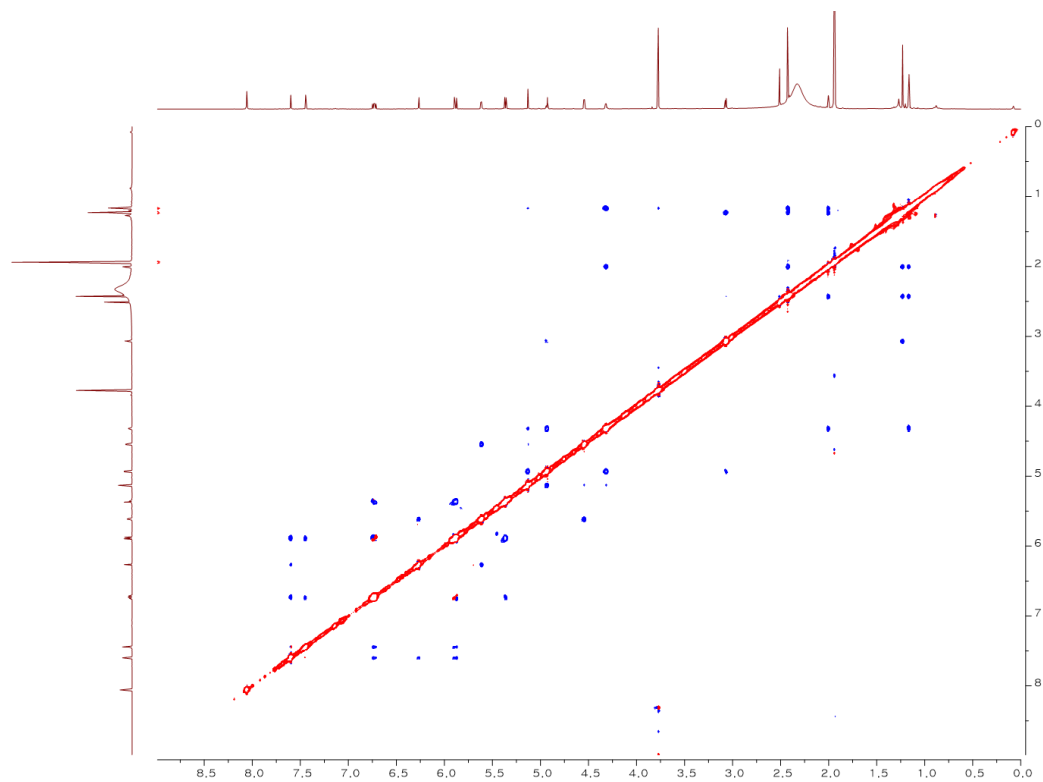

**Table S1.** NMR spectroscopic data of jejucarboside A (800 MHz, CD<sub>3</sub>CN) and jejucarbosides B-E (**1-4**) (850 MHz, CD<sub>3</sub>CN).

|               | Jejucarboside A        |                                              | Jejucarboside B (1)    |                                     | Jejucarboside C (2)    |                                     | Jejucarboside D (3)    |                                     | Jejucarboside E (4)    |                                     |
|---------------|------------------------|----------------------------------------------|------------------------|-------------------------------------|------------------------|-------------------------------------|------------------------|-------------------------------------|------------------------|-------------------------------------|
| Position      | $\delta_c$ , Type      | $\delta_H$ , Mult ( <i>J</i> in Hz)          | $\delta_c$ , Type      | $\delta_H$ , Mult ( <i>J</i> in Hz) | $\delta_c$ , Type      | $\delta_H$ , Mult ( <i>J</i> in Hz) | $\delta_c$ , Type      | $\delta_H$ , Mult ( <i>J</i> in Hz) | $\delta_c$ , Type      | $\delta_H$ , Mult ( <i>J</i> in Hz) |
| <b>1</b>      | 74.4, CH               | 5.32, d (7.0)                                | 74.6, CH               | 5.34, d (7.0)                       | 70.5, CH               | 4.25, d (5.5)                       | 70.7, CH               | 4.28, d (5.0)                       | 68.9, CH               | 4.54, d (6.0)                       |
| <b>2</b>      | 87.7, CH               | 5.59, dd (7.0, 3.0)                          | 87.5, CH               | 5.57, dd (7.0, 3.0)                 | 79.8, CH               | 4.59, dd (5.5, 3.0)                 | 79.6, CH               | 4.58, dd (5.0, 3.0)                 | 84.0, CH               | 5.61, dd (6.0, 3.0)                 |
| <b>3</b>      | 123.4, CH              | 6.53, d (3.0)                                | 122.4, CH              | 6.30, d (3.0)                       | 129.9, CH              | 6.57, d (3.0)                       | 127.6, CH              | 6.34, d (3.0)                       | 123.0, CH              | 6.27, d (3.0)                       |
| <b>3a</b>     | 154.8, C               |                                              | 156.5, C               |                                     | 150.3, C               |                                     | 152.0, C               |                                     | 154.6, C               |                                     |
| <b>3b</b>     | 134.4, C               |                                              | 137.7, C               |                                     | 134.7, C               |                                     | 138.4, C               |                                     | 137.8, C               |                                     |
| <b>4</b>      | 129.5, C               |                                              | 120.3, CH              | 7.68, s                             | 129.6, C               |                                     | 120.1, CH              | 7.58, s                             | 120.5, CH              | 7.60, s                             |
| <b>5</b>      | 137.8, C               |                                              | 142.1, C               |                                     | 137.5, C               |                                     | 141.8, C               |                                     | 141.8, C               |                                     |
| <b>6</b>      | 129.7, CH              | 7.73, d (8.0)                                | 129.2, CH              | 7.49, s                             | 128.8, CH              | 7.63, d (8.0)                       | 128.3, CH              | 7.42, s                             | 128.8, CH              | 7.44, s                             |
| <b>7</b>      | 126.3, CH              | 7.46, d (8.0)                                | 133.2, C               |                                     | 126.5, CH              | 7.40, d (8.0)                       | 133.5, C               |                                     | 133.5, C               |                                     |
| <b>7a</b>     | 151.8, C               |                                              | 146.6, C               |                                     | 152.6, C               |                                     | 147.4, C               |                                     | 147.6, C               |                                     |
| <b>8</b>      | 74.7, CH               | 5.01, s                                      | 73.3, CH               | 5.21, s                             | 73.8, CH               | 5.01, s                             | 72.5, CH               | 5.19, s                             | 72.7, CH               | 5.13, s                             |
| <b>8a</b>     | 95.4, C                |                                              | 95.1, C                |                                     | 96.6, C                |                                     | 96.2, C                |                                     | 96.4, C                |                                     |
| <b>9</b>      | 132.9, CH              | 7.16, dd (18.0, 11.0)                        | 135.9, CH              | 6.76, dd (18.0, 11.0)               | 133.2, CH              | 7.13, dd (17.5, 11.0)               | 136.2, CH              | 6.75, dd (18.0, 11.0)               | 136.1, CH              | 6.73, dd (17.5, 11.0)               |
| <b>10</b>     | 118.9, CH <sub>2</sub> | 5.52, dd (11.0, 1.0)<br>5.91, dd (18.0, 1.0) | 117.4, CH <sub>2</sub> | 5.40, d (11.0)<br>5.92, d (18.0)    | 118.3, CH <sub>2</sub> | 5.46, d (11.0)<br>5.85, d (17.5)    | 116.9, CH <sub>2</sub> | 5.36, d (11.0)<br>5.88, d (18.0)    | 117.1, CH <sub>2</sub> | 5.36, d (11.0)<br>5.88, d (17.5)    |
| <b>11</b>     | 156.6, C               |                                              | 156.5, C               |                                     |                        |                                     |                        |                                     | 156.2, C               |                                     |
| <b>11-OMe</b> |                        |                                              |                        |                                     |                        |                                     |                        |                                     | 55.5, CH <sub>3</sub>  | 3.77, s                             |
| <b>1'</b>     | 99.3, CH               | 4.27, d (7.5)                                | 99.7, CH               | 4.38, d (7.5)                       | 98.6, CH               | 4.95, d (8.0)                       | 99.3, CH               | 5.02, d (8.0)                       | 98.3, CH               | 4.93, d (8.0)                       |
| <b>2'</b>     | 72.8, CH               | 3.01, d (7.5)                                | 72.8, CH               | 2.99, d (7.5)                       | 73.3, CH               | 3.08, d (8.0)                       | 72.8, CH               | 3.09, d (8.0)                       | 73.1, CH               | 3.07, d (8.0)                       |
| <b>3'</b>     | 75.9, C                |                                              | 76.0, C                |                                     | 76.1, C                |                                     | 75.9, C                |                                     | 76.1, C                |                                     |
| <b>4'</b>     | 68.8, CH               | 1.88, m                                      | 68.8, CH               | 1.88, s                             | 68.8, CH               | 1.95, d (1.5)                       | 68.8, CH               | 1.97, d (1.5)                       | 68.8, CH               | 2.00, d (1.5)                       |
| <b>5'</b>     | 70.1, CH               | 3.86, m                                      | 70.0, CH               | 3.97, q (6.5)                       | 70.3, CH               | 4.20, qd (6.5, 1.5)                 | 70.1, CH               | 4.24, qd (6.5, 1.5)                 | 70.4, CH               | 4.32, qd (6.5, 1.5)                 |
| <b>6'</b>     | 16.5, CH <sub>3</sub>  | 1.08, d (6.5)                                | 16.6, CH <sub>3</sub>  | 1.10, d (6.5)                       | 17.0, CH <sub>3</sub>  | 1.13, d (6.5)                       | 16.5, CH <sub>3</sub>  | 1.15, d (6.5)                       | 17.0, CH <sub>3</sub>  | 1.17, d (6.5)                       |
| <b>7'</b>     | 23.7, CH <sub>3</sub>  | 1.20, s                                      | 23.6, CH <sub>3</sub>  | 1.19, s                             | 23.6, CH <sub>3</sub>  | 1.22, s                             | 23.7, CH <sub>3</sub>  | 1.23, s                             | 23.6, CH <sub>3</sub>  | 1.23, s                             |
| <b>8'</b>     | 39.1, CH <sub>3</sub>  | 2.42, s                                      | 39.1, CH <sub>3</sub>  | 2.40, s                             | 39.1, CH <sub>3</sub>  | 2.41, s                             | 39.1, CH <sub>3</sub>  | 2.41, s                             | 39.1, CH <sub>3</sub>  | 2.43, s                             |

**Table S2.** Composition of media used for culture optimization.

| <b>YEME</b>                                                                                                                         | <b>A1C</b>                                                                                             |
|-------------------------------------------------------------------------------------------------------------------------------------|--------------------------------------------------------------------------------------------------------|
| Yeast 4g/L<br>Glucose 4g/L<br>Malt 10g/L<br>Sea salt 14g/L                                                                          | Starch 10g/L<br>Yeast 4g/L<br>Phytone peptone 2g/L<br>Calcium Carbonate 1g/L<br>Sea salt 14g/L         |
| <b>YEME+Humic acid</b>                                                                                                              | <b>YEME+L-ornithine</b>                                                                                |
| Yeast 4g/L<br>Glucose 4g/L<br>Malt 10g/L<br>Humic acid 1g/L<br>Sea salt 14g/L                                                       | Yeast 4g/L<br>Glucose 4g/L<br>Malt 10g/L<br>L-Ornithine 2g/L<br>Sea salt 14g/L                         |
| <b>YEME+Humic acid+ L-ornithine</b>                                                                                                 | <b>A1</b>                                                                                              |
| Yeast 4g/L<br>Glucose 4g/L<br>Malt 10g/L<br>Humic acid 1g/L<br>L-Ornithine 2g/L<br>Sea salt 14g/L                                   | Starch 10g/L<br>Yeast 4g/L<br>Peptone 2g/L<br>Sea salt 14g/L                                           |
| <b>DSY</b>                                                                                                                          | <b>GLY</b>                                                                                             |
| Dextrin 10g/L<br>Soytone (soybean meal) 4g/L<br>Yeast 1g/L<br>NaCl 0.5g/L<br>Sea salt 14g/L                                         | Glycerol 20g/L<br>Lactose 10g/L<br>Malt 5g/L<br>Yeast 5g/L<br>Calcium Carbonate 1g/L<br>Sea salt 14g/L |
| <b>modified K</b>                                                                                                                   | <b>YPM</b>                                                                                             |
| Yeast 3g/L<br>Glucose 2g/L<br>Mannitol 2g/L<br>Malt 5g/L<br>Starch 5g/L<br>Soytone 5g/L<br>Calcium Carbonate 1g/L<br>Sea salt 14g/L | Yeast 2g/L<br>Mannitol 4g/L<br>Peptone 2g/L<br>Sea salt 14g/L                                          |

## Phylogenetic analysis of Eneidiyne Core Gene Amplicons

Translated amino acid sequences of the amplicons and references were aligned using MUSCLE (v5.1) [1], and gap-free consensus regions were extracted for their phylogenetic analysis. Phylogenetic analysis of the alignments was proceeded using RAXML (v8.2.11) [2] plugin installed in Geneious Prime software (v2023.0.4) with GAMMA DAYHOFF protein model and 100 bootstrap replicating number. The final bootstrap support percentage values were calculated by best-scoring maximum likelihood tree searching option in the plugin.

**Figure S26.** Phylogenetic tree of the amplicons.

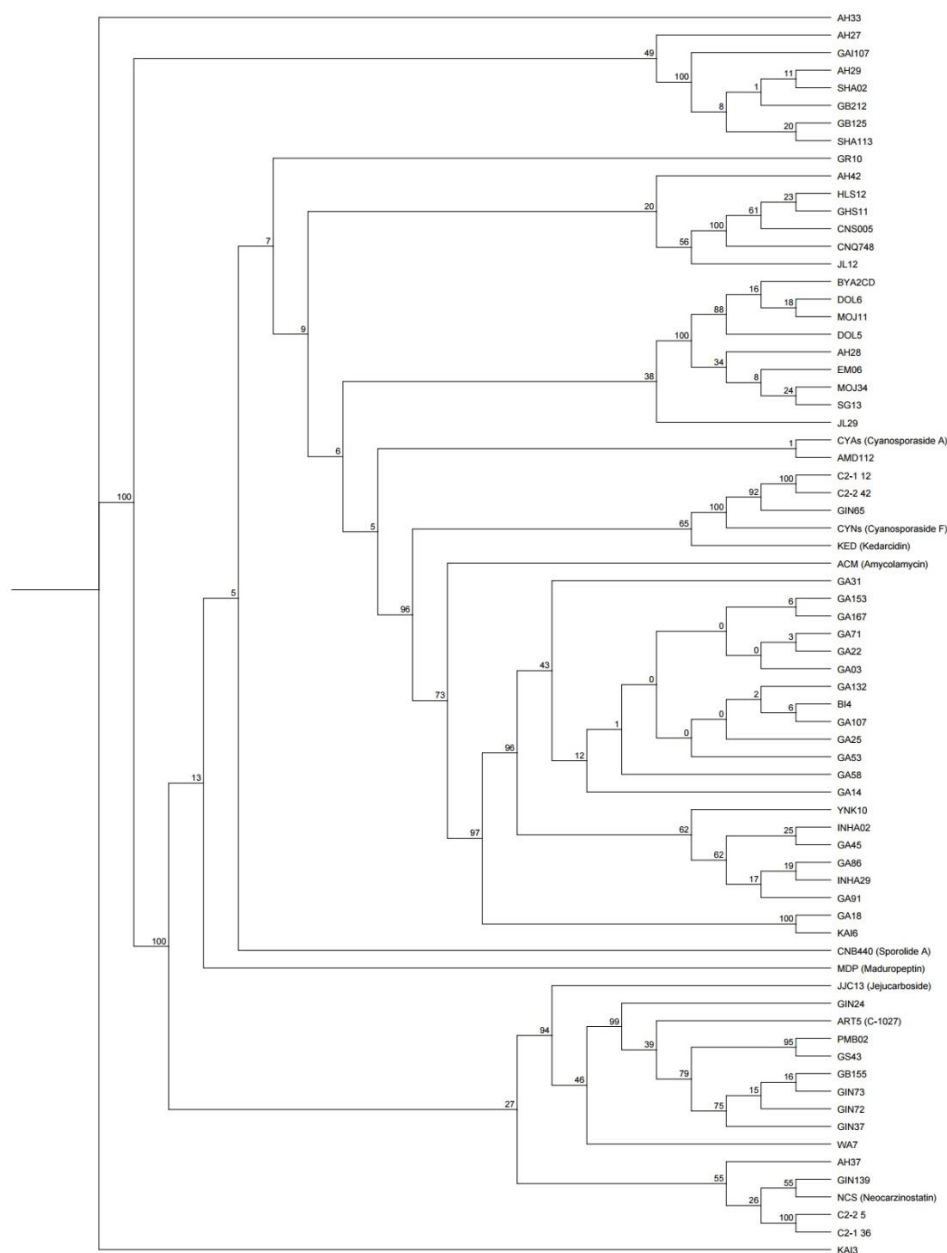

## References

- (1) Edgar, R. C. MUSCLE: multiple sequence alignment with high accuracy and high throughput. *Nucleic Acids Res.* **2004**, 32, 1792-1797. DOI: 10.1093/nar/gkh340.
- (2) Stamatakis, A. RAxML version 8: a tool for phylogenetic analysis and post-analysis of large phylogenies. *Bioinformatics* **2014**, 30, 1312-1313. DOI: 10.1093/bioinformatics/btu033.
